# Supplementary material for: Ecology, threats and conservation status of Carex buekii (Cyperaceae) in Central Europe
Source: PubMed Central journal article supplement (PMC6671956; doi:10.1038/s41598-019-47563-0), 2019-08-01
Supplement: 41598_2019_47563_MOESM1_ESM.pdf [file 41598_2019_47563_MOESM1_ESM.pdf]

## Supplementary Table S1

Ecology, threats and conservation status of *Carex buekii* (Cyperaceae) in Central Europe

Helena Więclaw<sup>1</sup>, Kateřina Šumberová<sup>2</sup>, Beata Bosiacka<sup>1</sup>, Richard Hrivnák<sup>3</sup>, Zygmunt Dajdok<sup>4</sup>, Attila Mesterházy<sup>5</sup>, Chiara Minuzzo<sup>6</sup>, Edoardo Martinetto<sup>7</sup>, Jacob Koopman<sup>8</sup>

<sup>1</sup>Institute of Marine & Environmental Sciences, University of Szczecin, Wąska 13, PL-71-415 Szczecin, Poland; <sup>2</sup>The Czech Academy of Sciences, Institute of Botany, Department of Vegetation Ecology, Lidická 25/27, CZ-602 00 Brno, Czech Republic; <sup>3</sup>Institute of Botany, Plant Science and Biodiversity Center, Slovak Academy of Sciences, Dúbravská cesta 9, SK-845 23 Bratislava, Slovakia; <sup>4</sup>Institute of Environmental Biology, University of Wrocław, Kanonia 6/8, PL-50-328 Wrocław, Poland; <sup>5</sup>Directorate of Hortobágy National Park, H-4024 Sumen utca 2, Debrecen, Hungary; <sup>6</sup>Regione Serramonte 10, I-10010 Andrate, Italy, <sup>7</sup>Earth Sciences Department, University of Turin, Via Valperga Caluso 35, I-10125 Turin, Italy, <sup>8</sup>ul. Kochanowskiego 27, PL-73-200 Choszczno, Poland  
e-mail: helena.wieclaw@usz.edu.pl

### Information about the studied area (stands of *Carex buekii*)

Expalnation: C/N – ratio between organic carbon and nitrogen concentration; org. mat. [%] – organic matter content; pH – soil pH; Ca [mg/kg] – calcium concentration; Mg [mg/kg] – magnesium concentration; P [mg/kg] – phosphorus concentration; K [mg/kg] – potassium concentration; ECe [dS/m] – electrolytic conductivity of the saturated soil extract

| Locality                                                                                             | Coordinates                | Habitat type / Shannon's diversity index                                                                 | Geology / soil type/soil properties                                                                                                                                                                                     | Climate                                                          | Elevation a. s. l. | Land cover                                                                                                                |
|------------------------------------------------------------------------------------------------------|----------------------------|----------------------------------------------------------------------------------------------------------|-------------------------------------------------------------------------------------------------------------------------------------------------------------------------------------------------------------------------|------------------------------------------------------------------|--------------------|---------------------------------------------------------------------------------------------------------------------------|
| <b>Czech Republic<sup>1,2</sup></b>                                                                  |                            |                                                                                                          |                                                                                                                                                                                                                         |                                                                  |                    |                                                                                                                           |
| Vltava river valley, Hluboká nad Vltavou, Munický stream I (reléve 21; see Supplementary material 2) | 49°02'30.2"N, 14°26'33.0"E | high and steep artificial stream banks (probably formed by mud regularly removed from the stream) / 2.78 | region: freshwater gravels and clays, in the catchment upstreams granites, gneisses, etc. / on the site loamy-clayey aluvial sediments/ org.mat=7.6; C/N=10.7; pH=5.8; Mg=94.7; P=377.1; K=672.1; Ca=1944.2; ECe=0.271. | mean annual tem. 8.0-9.0 sum of precipitation (year): 550-600 mm | 373                | flat fishpond basin with mosaic of tall sedge and reed beds, alluvial forests, wet grasslands and synanthropic vegetation |
| Vltava river valley, Hluboká nad Vltavou, Munický stream II (reléve 22)                              | 49°02'31.4"N, 14°26'37.9"E | high and steep artificial stream banks (probably formed by mud regularly removed from the stream) / 0    | region: freshwater gravels and clays, in the catchment upstreams granites, gneisses, etc. / on the site clayey aluvial sediments/ org.mat=9.4; C/N=12.5; pH=3.8; Mg=110.9; P=437.3; K=708.2; Ca=631.6; ECe=0.290.       | mean annual tem. 8.0-9.0 sum of precipitation (year): 550-600 mm | 371                | flat fishpond basin with mosaic of tall sedge beds, wet grasslands and synanthropic vegetation                            |

|                                                    |                                 |                                                                                                                          |                                                                                                                                                                                                                                                                                 |                                                                  |     |                                                                                                                         |
|----------------------------------------------------|---------------------------------|--------------------------------------------------------------------------------------------------------------------------|---------------------------------------------------------------------------------------------------------------------------------------------------------------------------------------------------------------------------------------------------------------------------------|------------------------------------------------------------------|-----|-------------------------------------------------------------------------------------------------------------------------|
| Vltava river, Hluboká nad Vltavou (relévé 23)      | 49°02'28.00" N,<br>14°26'43.7"E | high and steep artificial river bank, partly shaded by scattered trees / 0                                               | region: freshwater gravels and clays, in the catchment upstreams granites, gneisses, etc. / on the site loamy-sandy aluvial sediments/ org.mat=10.8; C/N=14.0; pH=4.1; Mg=117.4; P=249.8; K=218.4; Ca=955.1; ECe=0.314.                                                         | mean annual tem. 8.0-9.0 sum of precipitation (year): 550-600 mm | 371 | flat fishpond basin with mosaic of tall sedge beds, alluvial forests, wet grasslands and tall-forb nitrophilous fringes |
| Svratka river, Brno-Bystrc (relévé 24)             | 49°13'52.2"N,<br>16°31'48.7"E   | stony river deposit exposed to frequent water level fluctuations, partly shaded by the riverbank woody vegetation / 2.88 | region and the catchment upstream gneisses, mica-schists etc., rarely also calcareous sediments / on the site sandy to loamy-sandy alluvial sediment, with admixture of large stones/ org.mat=8.6; C/N=14.3; pH=6.3; Mg=120.1; P=381.1; K=134.1; Ca=2447.7; ECe=0.561.          | mean annual tem. 8.0-9.0 sum of precipitation (year): 500-550 mm | 210 | river valley in hilly country with mesic to alluvial forests, mesophilous grasslands and tall-forb nitrophilous fringes |
| Svratka river, Brno-Pisárky (relévé 25)            | 49°10'59.4"N,<br>16°34'58.5"E   | lower part of high and steep river bank (artificially modified) / 2.04                                                   | region and the catchment upstream gneisses, mica-schists etc., rarely also calcareous sediments / on the site sandy-loamy to loamy-sandy alluvial sediments/ org.mat=7.7; C/N=13.7; pH=7.0; Mg=171.7; P=504.9; K=211.2; Ca=3204.9; ECe=0.537.                                   | mean annual tem. 8.0-9.0 sum of precipitation (year): 500-550 mm | 200 | river valley in hilly country with mesic forests, tall nitrophilous fringes and synanthropic vegetation                 |
| Svitava river, Bílovice nad Svitavou I (relévé 26) | 49°14'14.6"N,<br>16°39'56.7"E   | high river bank formed by accumulated sediments, shaded by surrounding forest / 3.12                                     | region and the catchment upstream: mainly calcareous clays, claystones, etc. rarely also acidic sediments / on the site: loamy-sandy to loamy alluvial sediments, mixed with organic detritus/ org.mat=7.4; C/N=14.3; pH=7.4; Mg=145.6; P=736.4; K=193.5; Ca=7589.7; ECe=0.689. | mean annual tem. 8.0-9.0 sum of precipitation (year): 500-550 mm | 215 | river valley in hilly country with mesic forests, riverine vegetation                                                   |
| Svitava river, Bílovice nad Svitavou I (relévé 27) | 49°14'26.8"N,<br>16°40'15.1"E   | high and steep river bank (artificially modified) / 3.17                                                                 | region and the catchment upstream: mainly calcareous clays, claystones, etc. rarely also acidic sediments / on the site: sandy-loamy to loamy alluvial sediments/ org.mat=8.5; C/N=14.4; pH=7.4; Mg=131.5; P=717.7; K=256.2; Ca=8079.3; ECe=0.756.                              | mean annual tem. 8.0-9.0 sum of precipitation (year): 500-550 mm | 215 | river valley in hilly country with grassland, mesic forests and ruderal vegetation                                      |

|                                                              |                             |                                                                                                                                                               |                                                                                                                                                                                                                                                                        |                                                                  |     |                                                                                                                      |
|--------------------------------------------------------------|-----------------------------|---------------------------------------------------------------------------------------------------------------------------------------------------------------|------------------------------------------------------------------------------------------------------------------------------------------------------------------------------------------------------------------------------------------------------------------------|------------------------------------------------------------------|-----|----------------------------------------------------------------------------------------------------------------------|
| Jihlava river, Letkovice near Ivančice (reléve 28)           | 49°05'31.6"N, 16°20'55.4"E  | high river bank formed by accumulated sediments, shaded by a strip of woody vegetation / 2.19                                                                 | region and the catchment upstream: acidic bedrocks such as granits and gneisses, near Ivančice also calcareous conglomerates / on the site: loamy to loamy-clayey alluvial sediments/ org.mat=6.6; C/N=11.5; pH=7.0; Mg=342.0; P=657.9; K=237.7; Ca=1896.7; ECe=0.383. | mean annual tem. 8.0-9.0 sum of precipitation (year): 500–550 mm | 205 | river valley in hilly country with grassland, riverine, and mesophilous to hygrophilous forest and shrub vegetation  |
| Blanice river, Protivín (reléve 29)                          | 49°13'09.2"N, 14°12'55.1"E  | top part of high river bank (artificially modified), on the contact with regularly mown wet meadow / 2.52                                                     | region and the catchment upstream: freshwater gravels and clays, in the catchment upstreams granits, gneisses, etc. / on the site: loamy alluvial sediments/ org.mat=9.7; C/N=12.4; pH=4.5; Mg=227.6; P=230.2; K=302.7; Ca=1140.8; ECe=0.249.                          | mean annual tem. 8.0-9.0 sum of precipitation (year): 550–600 mm | 375 | flat fishpond basin with mosaic of wet meadows, tall nitrophilous fringes and scattered shrub vegetation             |
| Blanice river valley, Myšenec I, unnamed channel (reléve 30) | 49°13'12.2"N, 14°13'02.5"E  | top part of high channel bank (artificial), on the contact with regularly mown mesophilous to wet meadow, partly shaded by a strip of woody vegetation / 2.62 | region and the catchment upstream: freshwater gravels and clays, in the catchment upstreams granits, gneisses, etc. / on the site: loamy alluvial sediments/ org.mat=9.2; C/N=11.2; pH=4.1; Mg=288.9; P=243.7; K=150.2; Ca=753.3; ECe=0.169.                           | mean annual tem. 8.0-9.0 sum of precipitation (year): 550–600 mm | 375 | flat fishpond basin with mosaic of wet meadows, tall nitrophilous fringes, mesic to wet forests and shrub vegetation |
| Blanice river, Myšenec II (reléve 31)                        | 49°13'11.01"N, 14°13'23.6"E | high river bank (artificially modified) / 2.29                                                                                                                | region and the catchment upstream: freshwater gravels and clays, in the catchment upstreams granits, gneisses, etc. / on the site: loamy to loamy-clayey alluvial sediments/ org.mat=12.7; C/N=12.6; pH=5.0; Mg=264.0; P=239.8; K=235.3; Ca=1755.6; ECe=0.194.         | mean annual tem. 8.0-9.0 sum of precipitation (year): 550–600 mm | 375 | flat fishpond basin with mosaic of regularly mown wet meadows and tall nitrophilous fringes                          |
| Sázava river valley, Pohledští Dvořáci I (reléve 32)         | 49°36'40.5"N, 15°37'33.3"E  | middle course river alluvium, partly shaded by scattered shrubs / 2.30                                                                                        | region and the catchment upstream: acidic bedrocks such as granits and gneisses, rarely also limestones and amphibolites / on the site: loamy alluvial sediments/ org.mat=16.4; C/N=16.6; pH=3.7; Mg=81.4; P=137.3; K=593.4; Ca=462.2; ECe=0.157.                      | mean annual tem. 7.0-8.0 sum of precipitation (year): 650–700 mm | 415 | river valley in hilly country with unmown tall nitrophilous fringes, mesic to wet shrublands and ruderal vegetation  |

|                                                        |                             |                                                                                                                                                                  |                                                                                                                                                                                                                                                                                                                                                                                            |                                                                   |     |                                                                                                                                                              |
|--------------------------------------------------------|-----------------------------|------------------------------------------------------------------------------------------------------------------------------------------------------------------|--------------------------------------------------------------------------------------------------------------------------------------------------------------------------------------------------------------------------------------------------------------------------------------------------------------------------------------------------------------------------------------------|-------------------------------------------------------------------|-----|--------------------------------------------------------------------------------------------------------------------------------------------------------------|
| Sázava river valley, Pohledští Dvořáci II (reléve 33)  | 49°36'39.1"N, 15°37'34.1"E  | fishpond dam exposed to the middle course river alluvium, partly shaded by woody vegetation / 0.72                                                               | region and the catchment upstream: acidic bedrocks such as granits and gneisses, rarely also limestones and amhibolites / on the site: sandy-loamy to loamy sediments/ org.mat=10.9; C/N=14.2; pH=3.5; Mg=36.5; P=140.8; K=422.4; Ca=34.2; ECe=0.079.                                                                                                                                      | mean annual tem. 7.0-8.0 sum of precipitation (year): 650–700 mm  | 415 | river valley in hilly country with tall nitrophilous fringes, reed beds, and mesic to wet shrublands                                                         |
| Sázava river valley, Pohledští Dvořáci III (reléve 34) | 49°36'23.1"N, 15°37'40.0"E  | middle course river alluvium, partly shaded by high fishpond bank and shrub vegetation / 2.85                                                                    | region and the catchment upstream: acidic bedrocks such as granits and gneisses, rarely also limestones and amhibolites / on the site: loamy-clayey alluvial sediments/ org.mat=8.0; C/N=11.7; pH=4.7; Mg=94.7; P=112.1; K=649.6; Ca=639.5; ECe=0.124.                                                                                                                                     | mean annual tem. 7.0-8.0 sum of precipitation (year): 650–700 mm  | 415 | river valley in hilly country with unmown tall nitrophilous fringes, mesophilous to hygrophilous shrublands and ruderal vegetation                           |
| Labe river valley, Tři Dvory II (reléve 35, 36)        | 50°01'22.3"N, 15°14'52.7"E  | large shallow depression (probably former alluvial pool) with unmown vegetation in regularly mown wet alluvial meadow, partly shaded by forest margin / 1.61 / 0 | region and the catchment upstream very variable, including acidic as well as basic bedrocks (e.g. calcareous and noncalcareous sandstones and conglomerates, phyllites) / on the site loamy-clayey alluvial sediments / org.mat=13.7; C/N=11.8; pH=5.1; Mg=86.7; P=145.2; K=493.8; Ca=3212.9; ECe=0.116 / org.mat=13.4; C/N=12.0; pH=5.3; Mg=90.1; P=242.0; K=770.9; Ca=3089.6; ECe=0.183. | mean annual tem. 9.0–10.0 sum of precipitation (year): 550–600 mm | 195 | broad river floodplain with the mosaic of mown mesophilous to wet meadows, hard-wooded alluvial forests and unmown nitrophilous fringes                      |
| Labe river valley, Kolín (reléves 37)                  | 50°01'22.2"N, 15°13'52.00"E | on the top of high bank of river oxbow, partly shaded by forest / 2.62                                                                                           | region and the catchment upstream very variable, including acidic as well as basic bedrocks (e.g. calcareous and noncalcareous sandstones and conglomerates, phyllites) / on the site loamy-sandy alluvial sediments/ org.mat=9.2; C/N=14.0; pH=7.2; Mg=86.8; P=303.9; K=342.1; Ca=6657.3; ECe=0.236.                                                                                      | mean annual tem. 9.0–10.0 sum of precipitation (year): 550–600 mm | 195 | broad river floodplain with the mosaic of arable field, remnants of mesophilous grasslands and hard-wooded alluvial forests, and unmown nitrophilous fringes |

|                                                               |                            |                                                                                             |                                                                                                                                                                                                                                                                                                                           |                                                                  |     |                                                                                                               |
|---------------------------------------------------------------|----------------------------|---------------------------------------------------------------------------------------------|---------------------------------------------------------------------------------------------------------------------------------------------------------------------------------------------------------------------------------------------------------------------------------------------------------------------------|------------------------------------------------------------------|-----|---------------------------------------------------------------------------------------------------------------|
| Orlice river valley, Hradec Králové-Malšovice I (reléve 38)   | 50°12'28.6"N, 15°51'16.5"E | shallow depression on the margin of mown mesophilous meadow, partly shaded by forest / 1.61 | region and the catchment upstream: mainly calcareous sediments, e.g. marls, argillites, conglomerates and sandstones, more rarely acidic bedrocs, e.g. granits and gneisses / on the site sandy-loamy to clayey-loamy alluvial sediments/ org.mat=7.8; C/N=12.7; pH=4.8; Mg=47.9; P=187.9; K=310.8; Ca=2168.0; ECe=0.093. | mean annual tem. 8.0–9.0 sum of precipitation (year): 600–650 mm | 225 | mesophilous to wet grasslands and remnants of hard-wooded alluvial forests                                    |
| Orlice river valley, Hradec Králové-Malšovice II (reléve 39)  | 50°12'30.6"N, 15°51'30.2"E | bank of the river arm (now adjusted for fish farming use), shaded by forest / 3.12          | region and the catchment upstream: mainly calcareous sediments, e.g. marls, argillites, conglomerates and sandstones, more rarely acidic bedrocs, e.g. granits and gneisses / on the site sandy-loamy to loamy alluvial sediments / org.mat=8.3; C/N=12.1; pH=5.0; Mg=50.0; P=96.8; K=175.9; Ca=1966.7; ECe=0.136.        | mean annual tem. 8.0–9.0 sum of precipitation (year): 600–650 mm | 225 | reed beds, unmown nitrophilous fringes and remnants of hard-wooded alluvial forests                           |
| Orlice river valley, Hradec Králové-Malšovice III (reléve 40) | 50°12'35.5"N, 15°51'47.3"E | margin of abandoned wet meadow at a river arm / 1.61                                        | region and the catchment upstream: mainly calcareous sediments, e.g. marls, argillites, conglomerates and sandstones, more rarely acidic bedrocs, e.g. granits and gneisses / on the site loamy-sandy to loamy alluvial sediments / org.mat=9.0; C/N=11.2; pH=4.5; Mg=78.4; P=126.0; K=114.0; Ca=1608.6; ECe=0.106.       | mean annual tem. 8.0–9.0 sum of precipitation (year): 600–650 mm | 230 | mesophilous to wet alluvial meadows, unmown nitrophilous fringes and remnants of hard-wooded alluvial forests |

### Hungary<sup>3</sup>

|                                        |                        |                                                |                                                                                                                   |                                                                   |     |               |
|----------------------------------------|------------------------|------------------------------------------------|-------------------------------------------------------------------------------------------------------------------|-------------------------------------------------------------------|-----|---------------|
| Kerca rivulet, Kercaszomor (reléve 62) | 46°46'54"N, 16°19'51"E | banks of Kerca-rivulet, in alder forest / 4.05 | aluvial sands, gravels and muds/ org.mat=13.9; C/N=11.4; pH=3.9; Mg=65.4; P=63.4; K=195.9; Ca=463.3; ECe=0.178.   | mean annual tem. 9.0-10.0 sum of precipitation (year): 800-850 mm | 230 | alder forest  |
| Pinka river, Felsőcsatár (reléve 63)   | 47°12'33"N, 16°25'55"E | banks of Pinka-river in willow forest / 2.97   | aluvial sands, gravels and muds / org.mat=8.3; C/N=10.2; pH=5.9; Mg=177.3; P=127.3; K=73.9; Ca=2330.4; ECe=0.267. | mean annual tem. 9.0-10.0 sum of precipitation (year): 800-850 mm | 245 | willow forest |

|                                                           |                           |                                                              |                                                                                                                                                                                                     |                                                                   |     |                                               |
|-----------------------------------------------------------|---------------------------|--------------------------------------------------------------|-----------------------------------------------------------------------------------------------------------------------------------------------------------------------------------------------------|-------------------------------------------------------------------|-----|-----------------------------------------------|
| Huszászi stream, Csörötnek (reléve 64)                    | 46°56'12"N,<br>16°22'40"E | in alder forest near Huszászi-stream / 3.84                  | aluvial sands, gravels and muds / org.mat=7.2; C/N=11.9; pH=3.6; Mg=74.3; P=31.0; K=67.5; Ca=468.6; ECe=0.142.                                                                                      | mean annual tem. 9.0-10.0 sum of precipitation (year): 800-850 mm | 230 | alder forest                                  |
| Zala stream, Óriszentpéter (reléve 66)                    | 46°50'38"N,<br>16°23'51"E | banks of Zala-stream in willow forest / 3.21                 | aluvial sands, gravels and muds / org.mat=11.1; C/N=9.8; pH=5.6; Mg=223.5; P=110.7; K=118.0; Ca=2868.5; ECe=0.152.                                                                                  | mean annual tem. 9.0-10.0 sum of precipitation (year): 800-850 mm | 230 | willow forest                                 |
| Rába river, Körmend (reléve 65)                           | 46°59'45"N,<br>16°35'56"E | banks of a small oxbow / 3.22                                | aluvial sands, gravels and muds / org.mat=6.6; C/N=9.9; pH=5.9; Mg=78.3; P=31.0; K=53.8; Ca=2016.7; ECe=0.225.                                                                                      | mean annual tem. 9.0-10.0 sum of precipitation (year): 800-850 mm | 185 | edge of floodplain meadows                    |
| Apátistvánfalvai stream, Apátistvánfalva (reléves 67, 68) | 46°54'47"N,<br>16°17'45"E | in wet alder forest near Apátistvánfalvi-stream / 3.71/ 2.81 | aluvial sands, gravels and muds / org.mat=7.1; C/N=11.1; pH=6.0; Mg=132.3; P=82.0; K=60.2; Ca=1801.6; ECe=0.097 / org.mat=22.2; C/N=11.9; pH=4.0; Mg=169.6; P=125.6; K=141.3; Ca=1886.5; ECe=0.707. | mean annual tem. 9.0-10.0 sum of precipitation (year): 800-850 mm | 255 | alder forest                                  |
| Tarna rivulet, Kompolt (reléve 69)                        | 47°45'10"N,<br>20°15'05"E | edge of a haymeadow 100 m of Tarna-rivulet / 3.51            | aluvial sands, gravels and muds / org.mat=9.2; C/N=10.9; pH=5.9; Mg=105.6; P=256.4; K=466.5; Ca=3129.7; ECe=0.167.                                                                                  | mean annual tem. 9.0-10.0 sum of precipitation (year): 500-550 mm | 115 | edge of semidry hay meadow, near a crop field |
| Kerka rivulet, Kerkáskápolna (reléve 70)                  | 46°46'52"N,<br>16°25'06"E | banks of an old riverbed in an alder forest / 3.84           | aluvial sands, gravels and muds / org.mat=8.6; C/N=11.1; pH=4.7; Mg=126.9; P=181.8; K=232.9; Ca=1270.8; ECe=0.428.                                                                                  | mean annual tem. 9.0-10.0 sum of precipitation (year): 800-850 mm | 208 | alder forest                                  |
| Szentgyörgyvölgyi stream, Szentgyörgyvölgy (reléve 71)    | 46°43'37"N,<br>16°23'57"E | on a hillside, near near a spring / 4.25                     | aluvial sands, gravels and muds / org.mat=14.7; C/N=12.9; pH=5.5; Mg=116.8; P=149.1; K=93.1; Ca=1907.8; ECe=0.248.                                                                                  | mean annual tem. 9.0-10.0 sum of precipitation (year): 800-850 mm | 194 | grazed mezophilous meadow near a spring       |
| Kerka rivulet, Bajánsenye (reléve 72)                     | 46°47'54"N,<br>16°22'51"E | banks of Kerka-rivulet, in a wet willow forest / 3.14        | aluvial sands, gravels and muds / org.mat=11.3; C/N=12.2; pH=3.3; Mg=76.2; P=58.0; K=85.9; Ca=86.5; ECe=0.087.                                                                                      | mean annual tem. 9.0-10.0 sum of precipitation (year): 800-850 mm | 225 | willow forest                                 |

|                                               |                           |                                                                                                     |                                                                                                                               |                                                                            |     |                                                         |
|-----------------------------------------------|---------------------------|-----------------------------------------------------------------------------------------------------|-------------------------------------------------------------------------------------------------------------------------------|----------------------------------------------------------------------------|-----|---------------------------------------------------------|
| Hór stream,<br>Répáshuta (reléve<br>73)       | 48°01'54"N,<br>20°33'18"E | former hay meadow, which<br>was abandoned and<br>covered with <i>Magnocaricion</i><br>stands / 2.22 | aluvial sands, gravels and muds /<br>org.mat=14.4; C/N=14.0; pH=6.8;<br>Mg=751.4; P=330.9; K=298.7;<br>Ca=14455.0; ECe=0.944. | mean annual tem.<br>5.0-6.0 sum of<br>precipitation (year):<br>650-700 mm  | 370 | abandoned hay<br>meadow                                 |
| Bán stream,<br>Bélapátfalva<br>(reléve 74)    | 48°01'15"N,<br>20°19'44"E | former hay meadow, which<br>was abandoned and<br>covered with <i>Magnocaricion</i><br>stands / 2.85 | aluvial sands, gravels and muds /<br>org.mat=11.2; C/N=12.0; pH=7.3;<br>Mg=239.3; P=325.3; K=638.4;<br>Ca=19296.8; ECe=0.364. | mean annual tem.<br>7.0-8.0 sum of<br>precipitation (year):<br>600-650 mm  | 265 | abandoned hay<br>meadow                                 |
| Csermely stream,<br>Lénárdaróc<br>(reléve 75) | 48°09'09"N,<br>20°22'54"E | former hay meadow, which<br>was abandoned and<br>covered with <i>Magnocaricion</i><br>stands / 3.19 | aluvial sands, gravels and muds /<br>org.mat=12.0; C/N=12.4; pH=7.3;<br>Mg=538.3; P=425.1; K=228.1;<br>Ca=33633.3; ECe=0.406. | mean annual tem.<br>7.0-8.0 sum of<br>precipitation (year):<br>600-650 mm  | 270 | abandoned hay<br>meadow                                 |
| Eger stream,<br>Mikófalva (reléve<br>76)      | 48°04'05"N,<br>20°18'55"E | former hay meadow, which<br>was abandoned and<br>covered with <i>Magnocaricion</i><br>stands / 3.57 | aluvial sands, gravels and muds /<br>org.mat=8.2; C/N=12.5; pH=7.3;<br>Mg=861.1; P=250.7; K=291.5;<br>Ca=14736.9; ECe=0.318.  | mean annual tem.<br>7.0-8.0 sum of<br>precipitation (year):<br>600-650 mm  | 284 | abandoned hay<br>meadow                                 |
| Bán stream,<br>Nagyvisnyó reléve<br>77)       | 48°07'46"N,<br>20°24'11"E | banks of Bán-stream in an<br>alder forest / 3.98                                                    | aluvial sands, gravels and muds /<br>org.mat=11.2; C/N=10.7; pH=6.4;<br>Mg=182.9; P=178.3; K=215.2;<br>Ca=3376.6; ECe=0.482.  | mean annual tem.<br>7.0-8.0 sum of<br>precipitation (year):<br>600-650 mm  | 300 | alder forest near a<br>pasture                          |
| Ipoly river,<br>Ipolyvece I (reléve<br>78)    | 48°04'11"N,<br>19°07'21"E | banks of Ipoly river in willow<br>forest / 3.61                                                     | aluvial sands, gravels and muds /<br>org.mat=9.3; C/N=11.6; pH=5.1;<br>Mg=191.3; P=312.6; K=262.6;<br>Ca=1864.9; ECe=0.200.   | mean annual tem.<br>9.0-10.0 sum of<br>precipitation (year):<br>500-550 mm | 130 | edge of willow forest<br>near an alluvial hay<br>meadow |
| Ipoly river,<br>Ipolyvece II (reléve<br>79)   | 48°03'57"N,<br>19°06'43"E | banks of an old oxbow, near<br>a hay meadow / 3.69                                                  | aluvial sands, gravels and muds /<br>org.mat=8.0; C/N=12.5; pH=5.7;<br>Mg=104.6; P=303.5; K=248.9;<br>Ca=2205.5; ECe=0.117.   | mean annual tem.<br>9.0-10.0 sum of<br>precipitation (year):<br>500-550 mm | 130 | edge of floodplain<br>meadows                           |
| Ipoly river,<br>Drégelypalánk<br>(reléve 80)  | 48°03'57"N,<br>19°02'48"E | banks of Ipoly river in willow<br>forest / 3.21                                                     | aluvial sands, gravels and muds /<br>org.mat=10.3; C/N=10.8; pH=6.4;<br>Mg=219.8; P=327.0; K=220.0;<br>Ca=3093.2; ECe=0.207.  | mean annual tem.<br>9.0-10.0 sum of<br>precipitation (year):<br>500-550 mm | 126 | willow forest near an<br>alluvial hay meadow            |

|                                             |                          |                                                             |                                                                                                                  |                                                                |     |                                                                                                                                                                                      |
|---------------------------------------------|--------------------------|-------------------------------------------------------------|------------------------------------------------------------------------------------------------------------------|----------------------------------------------------------------|-----|--------------------------------------------------------------------------------------------------------------------------------------------------------------------------------------|
| Malone river valley, Lombardore (relève 81) | 45°14'40"N,<br>7°43'59"E | banks of a small oxbow-type of environment / 3.45           | aluvial sands, gravels and muds / org.mat=4.0; C/N=11.4; pH=5.4; Mg=102.6; P=106.4; K=41.8; Ca=396.7; ECe=0.045. | mean annual tem. 12.1 sum of precipitation (year): 848 mm      | 229 | tall-sedge communities of the old river banks ( <i>Magnocaricion</i> ), with bushes and separate trees around (willows and alders)                                                   |
| Malone river valley, Rivarossa (relève 82)  | 45°15'16"N,<br>7°43'49"E | old floodplain (no more flooded) of the Malone river / 3.40 | river alluvial soils / org.mat=9.9; C/N=10.3; pH=4.8; Mg=103.4; P=100.7; K=94.0; Ca=1146.6; ECe=0.124.           | mean annual tem. 11.9-12.0 sum of precipitation (year): 852 mm | 235 | tall-sedge communities of long time abandoned field or meadow ( <i>Magnocaricion</i> ), with a lot of woodland and <i>Populus</i> plantations around                                 |
| Malone river valley, Front (relève 83)      | 45°16'42"N,<br>7°40'49"E | old floodplain (no more flooded) of the Malone river / 2.98 | river alluvial soils / org.mat=9.4; C/N=11.4; pH=4.2; Mg=109.4; P=63.7; K=183.1; Ca=693.7; ECe=0.095.            | mean annual tem. 11.7 sum of precipitation (year): 857 mm      | 261 | tall-sedge communities of long time abandoned field or meadow ( <i>Magnocaricion</i> ), with bushes and separate trees, within a mosaic of floodplain meadows and crop fields        |
| Malone river valley, Front (relève 84)      | 45°16'23"N,<br>7°41'38"E | old floodplain (no more flooded) of the Malone river / 3.51 | river alluvial soils / org.mat=14.8; C/N=12.5; pH=5.6; Mg=156.1; P=526.3; K=182.3; Ca=1823.6; ECe=0.214.         | mean annual tem. 11.7 sum of precipitation (year): 857 mm      | 253 | tall-sedge communities of long time abandoned field or meadow ( <i>Magnocaricion</i> ), with bushes and separate trees around, within a mosaic of floodplain meadows and crop fields |

---

**Poland<sup>5,6,7</sup>**

|                                                           |                               |                                                                   |                                                                                                        |                                                                    |     |                                                                 |
|-----------------------------------------------------------|-------------------------------|-------------------------------------------------------------------|--------------------------------------------------------------------------------------------------------|--------------------------------------------------------------------|-----|-----------------------------------------------------------------|
| Odra river valley, Wrocław-Swojec (relève 1)              | 51°06'49.8"N,<br>17°06'40.4"E | banks of the navigation canal on the odra river floodplain / 3.23 | river alluvial soils / org.mat=7.0; C/N=13.2; pH=5.1; Mg=39.2; P=201.0; K=493.8; Ca=1111.9; ECe=0.203. | mean annual temp. 8.0-8.5; sum of precipitation (year): 550-600 mm | 113 | regenerative managed vegetation, with bushes and separate trees |
| Odra river valley, Wrocław-Wojnów (Strachocin) (relève 2) | 51°05'46.5"N,<br>17°08'07.9"E | small depression on the Odra river floodplain / 3.26              | river alluvial soils / org.mat=9.7; C/N=12.1; pH=4.6; Mg=69.7; P=266.0; K=372.6; Ca=931.2; ECe=0.194.  | mean annual temp. 8.0-8.5; sum of precipitation (year): 550-600 mm | 118 | floodplain meadows ( <i>Cnidion</i> ), currently not mown       |



|                                                                |                            |                                                                          |                                                                                                          |                                                                    |     |                                                                                                   |
|----------------------------------------------------------------|----------------------------|--------------------------------------------------------------------------|----------------------------------------------------------------------------------------------------------|--------------------------------------------------------------------|-----|---------------------------------------------------------------------------------------------------|
| Odra river valley, Janowice (Jeszkowice-Jakubowice) (relève 3) | 51°02'35.2"N, 17°12'04.3"E | small depression on the Odra river floodplain / 2.73                     | river alluvial soils / org.mat=18.8; C/N=18.0; pH=4.5; Mg=75.2; P=512.3; K=434.4; Ca=1326.9; ECe=0.274.  | mean annual temp. 8.0-8.5; sum of precipitation (year): 550-600 mm | 120 | mosaic of floodplain meadows ( <i>Cnidion</i> ) and crop fields                                   |
| Odra river valley, Janowice (Jeszkowice) (relève 4)            | 51°02'43.0"N, 17°12'25.7"E | banks of Odra old river bed / 2.78                                       | river alluvial soils / org.mat=14.0; C/N=15.2; pH=4.3; Mg=88.5; P=376.3; K=363.8; Ca=957.8; ECe=0.208.   | mean annual temp. 8.0-8.5; sum of precipitation (year): 550-600 mm | 120 | mosaic of floodplain meadows ( <i>Cnidion</i> ) and crop fields                                   |
| Odra river valley, Siechnice I (relève 5)                      | 51°02'25.3"N, 17°11'43.2"E | floodplain of the Odra river / 3.09                                      | river alluvial soils / org.mat=11.9; C/N=14.4; pH=4.9; Mg=91.9; P=256.4; K=248.9; Ca=1689.0; ECe=0.173.  | mean annual temp. 8.0-8.5; sum of precipitation (year): 550-600 mm | 122 | transition zone between riverside elm carrs and floodplain meadows ( <i>Cnidion</i> )             |
| Odra river valley, Siechnice II (relève 6)                     | 51°02'17.1"N, 17°11'32.1"E | floodplain of the Odra river / 4.24                                      | river alluvial soils / org.mat=11.6; C/N=12.1; pH=4.7; Mg=103.1; P=110.3; K=265.0; Ca=1776.9; ECe=0.178. | mean annual temp. 8.0-8.5; sum of precipitation (year): 550-600 mm | 121 | mosaic of floodplain meadows ( <i>Cnidion</i> ) and tall-sedge communities                        |
| Kaczawa river valley, Kwiatkowice (relève 7)                   | 51°17'12.5"N, 16°25'12.0"E | floodplain of the Kaczawa and Odra rivers / 3.11                         | river alluvial soils / org.mat=13.3; C/N=11.5; pH=4.8; Mg=94.0; P=524.1; K=293.1; Ca=1341.3; ECe=0.237.  | mean annual temp. 8.0-8.5; sum of precipitation (year): 500-550 mm | 95  | mosaic of floodplain meadows ( <i>Cnidion</i> ) and tall-sedge communities                        |
| Odra river valley, Gosławice (relève 8)                        | 51°13'21.2"N, 16°49'37.6"E | artificial railway embankment in the floodplain of the Odra river / 3.46 | artificial substratum / org.mat=6.4; C/N=17.3; pH=6.0; Mg=53.6; P=336.2; K=308.4; Ca=1321.3; ECe=0.123.  | mean annual temp. 8.0-8.5; sum of precipitation (year): 550-600 mm | 108 | sedge communit on the edge of the railway embankment                                              |
| Odra river valley, Warzyna (relève 9)                          | 51°15'18.5"N, 16°46'44.6"E | floodplain of the Odra river / 3.16                                      | river alluvial soils / org.mat=5.7; C/N=12.0; pH=4.8; Mg=44.4; P=165.7; K=765.3; Ca=514.4; ECe=0.156.    | mean annual temp. 8.0-8.5; sum of precipitation (year): 550-600 mm | 106 | mosaic of floodplain meadows ( <i>Alopecurion</i> ) and sege communities ( <i>Magnocaricion</i> ) |
| Bystrzyca river valley, Wrocław - Jarnołtów (relève 10)        | 51°07'29.9"N, 16°50'30.9"E | small depression on the Bystrzyca river floodplain / 2.64                | river alluvial soils / org.mat=13.5; C/N=16.7; pH=5.3; Mg=97.8; P=378.4; K=384.6; Ca=1522.9; ECe=0.214.  | mean annual temp. 8.0-8.5; sum of precipitation (year): 550-600 mm | 115 | mosaic of floodplain meadows ( <i>Alopecurion</i> ) and sege communities ( <i>Magnocaricion</i> ) |

|                                                      |                            |                                                               |                                                                                                          |                                                                    |     |                                                                                                   |
|------------------------------------------------------|----------------------------|---------------------------------------------------------------|----------------------------------------------------------------------------------------------------------|--------------------------------------------------------------------|-----|---------------------------------------------------------------------------------------------------|
| Bystrzyca river valley, Wrocław – Ratyń (relève 11)  | 51°07'30.8"N, 16°50'40.2"E | banks of the Bystrzyca old river bed / 2.85                   | river alluvial soils / org.mat=15.5; C/N=18.5; pH=5.1; Mg=72.1; P=985.4; K=454.5; Ca=915.4; ECe=0.205.   | mean annual temp. 8.0-8.5; sum of precipitation (year): 550-600 mm | 116 | mosaic of floodplain meadows ( <i>Alopecurion</i> ) and sege communities ( <i>Magnocaricion</i> ) |
| Odra river valley, Kopanie I (relève 12)             | 50°48'47.3"N, 17°38'08.1"E | floodplain of the Odra river / 2.72                           | river alluvial soils / org.mat=11.5; C/N=11.9; pH=4.5; Mg=104.9; P=211.0; K=272.2; Ca=1301.5; ECe=0.250. | mean annual temp. 8.0-8.5; sum of precipitation (year): 600-650 mm | 139 | <i>Populus</i> plantation                                                                         |
| Odra river valley, Kopanie II (relève 13)            | 50°48'49.5"N, 17°38'09.7"E | floodplain of the Odra river / 3.01                           | river alluvial soils / org.mat=12.6; C/N=12.1; pH=5.7; Mg=91.0; P=782.6; K=285.1; Ca=2404.2; ECe=0.315.  | mean annual temp. 8.0-8.5; sum of precipitation (year): 600-650 mm | 138 | tall-sedge communities of the old river banks ( <i>Magnocaricion</i> )                            |
| Odra river valley, Kruszyna (relève 14)              | 50°50'28.4"N, 17°32'42.7"E | floodbank the in floodplain of the Odra river / 3.21          | artificial substratum / org.mat=5.3; C/N=17.3; pH=4.3; Mg=48.2; P=120.3; K=290.7; Ca=471.8; ECe=0.116.   | mean annual temp. 8.0-8.5; sum of precipitation (year): 600-650 mm | 136 | mosaic of sedge and meadow communities of the floodbank                                           |
| Odra river valley, Kotowice – Czernica (relève 15)   | 51°02'43.5"N, 17°13'18.1"E | floodplain of the Odra river / 2.89                           | river alluvial soils / org.mat=13.3; C/N=23.3; pH=5.1; Mg=54.3; P=898.6; K=142.9; Ca=901.8; ECe=0.151.   | mean annual temp. 8.0-8.5; sum of precipitation (year): 550-600 mm | 125 | tall-sedge communities of the banks of Odra tributary ( <i>Magnocaricion</i> )                    |
| Oława river valley, Wrocław - Mokry Dwór (relève 16) | 51°04'11.0"N, 17°08'21.3"E | floodplain of the Oława river / 3.16                          | river alluvial soils / org.mat=14.8; C/N=11.6; pH=4.5; Mg=116.4; P=220.6; K=333.2; Ca=2150.7; ECe=0.234. | mean annual temp. 8.0-8.5; sum of precipitation (year): 550-600 mm | 118 | mosaic of floodplain meadows ( <i>Cnidion</i> ) and sedge communities ( <i>Magnocaricion</i> )    |
| Odra river valley, Trestno (relève 17)               | 51°04'32.1"N, 17°09'09.5"E | floodplain of the Odra river / 3.83                           | river alluvial soils / org.mat=8.9; C/N=11.6; pH=4.8; Mg=123.4; P=246.3; K=459.3; Ca=1644.6; ECe=0.211.  | mean annual temp. 8.0-8.5; sum of precipitation (year): 550-600 mm | 119 | tall-sedge communities of the Odra river floodplain ( <i>Magnocaricion</i> )                      |
| Oława river valley, Wrocław – Światniki (relève 18)  | 51°05'40.0"N, 17°06'31.1"E | floodplain of the Oława river / 3.97                          | river alluvial soils / org.mat=14.8; C/N=12.6; pH=5.2; Mg=98.3; P=333.1; K=485.8; Ca=2500.6; ECe=0.271.  | mean annual temp. 8.0-8.5; sum of precipitation (year): 550-600 mm | 117 | tall-sedge communities of the Oława river floodplain ( <i>Magnocaricion</i> )                     |
| Oława river valley, Wrocław - Nowy Dom (relève 19)   | 51°05'31.8"N, 17°06'10.2"E | banks of the Oława river near its outlet to Odra river / 3.31 | river alluvial soils / org.mat=13.0; C/N=12.5; pH=5.7; Mg=86.4; P=230.6; K=950.8; Ca=2654.7; ECe=0.261.  | mean annual temp. 8.0-8.5; sum of precipitation (year): 550-600 mm | 118 | tall-sedge communities of the Oława river banks ( <i>Magnocaricion</i> )                          |

|                                                   |                               |                                                          |                                                                                                                                                                                                                |                                                                    |     |                                                          |
|---------------------------------------------------|-------------------------------|----------------------------------------------------------|----------------------------------------------------------------------------------------------------------------------------------------------------------------------------------------------------------------|--------------------------------------------------------------------|-----|----------------------------------------------------------|
| Odra river valley, Stary Otok (relève 20)         | 50°58'41.7"N,<br>17°19'56.4"E | banks of the old river bed of Odra river / 3.44          | river alluvial soils / org.mat=3.9; C/N=13.5; pH=3.7; Mg=12.3; P=88.5; K=101.2; Ca=462.0; ECe=0.048.                                                                                                           | mean annual temp. 8.0-8.5; sum of precipitation (year): 550-600 mm | 126 | tall-sedge community of the sandy banks of old river bed |
| <b>Slovakia<sup>8</sup></b>                       |                               |                                                          |                                                                                                                                                                                                                |                                                                    |     |                                                          |
| Veľká Lúka, sw. from the village (relève 41)      | 48°37'32.4"N,<br>19°09'33.5"E | bank of the canal near road / 3.22                       | clays with lignite, sands, gravels / org.mat=11.6; C/N=12.4; pH=7.0; Mg=296.0; P=307.8; K=534.8; Ca=6679.9; ECe=0.320.                                                                                         | mean annual tem. 7.0-8.0 sum of precipitation (year): 600-700 mm   | 304 | crop fields and pastures                                 |
| Lukavica, n. margin of the village (relève 42)    | 48°38'39.8"N,<br>19°12'32.4"E | bank of the stream / 1.94                                | clays with lignite, sands, gravels / org.mat=6.1; C/N=12.2; pH=6.8; Mg=68.1; P=100.7; K=640.8; Ca=1948.2; ECe=0.141.                                                                                           | mean annual tem. 6.0-7.0 sum of precipitation (year): 700-800 mm   | 344 | floodplain meadows and shrubs                            |
| Slovenská Ľupča, sw. from the village (relève 43) | 48°45'15.1"N,<br>19°15'33.3"E | terrain depression on the Hron river floodplain / 3.32   | dark-gray limestones / org.mat=8.7; C/N=14.4; pH=7.4; Mg=751.5; P=266.8; K=369.4; Ca=8536.0; ECe=0.150.                                                                                                        | mean annual tem. 7.0-8.0 sum of precipitation (year): 700-800 mm   | 371 | artificial surfaces and floodplain meadows               |
| Valaská, se. from the village (relève 44)         | 48°48'44.1"N,<br>19°35'26.7"E | bank of the river / 2.66                                 | varied shales, sandstones and dolomites / org.mat=5.1; C/N=15.9; pH=7.4; Mg=333.5; P=396.8; K=133.3; Ca=4512.7; ECe=0.091.                                                                                     | mean annual tem. 7.0-8.0 sum of precipitation (year): 700-800 mm   | 480 | floodplain meadows, riparian shrubs and forests          |
| Pitelová, Čierne Zeme settlement (relève 45)      | 48°35'29.8"N,<br>18°55'24.2"E | bank of the canal near road / 1.48                       | pyroxene and hornblende-pyroxene andesites / org.mat=9.2; C/N=13.5; pH=6.1; Mg=102.1; P=301.7; K=974.0; Ca=2197.9; ECe=0.184.                                                                                  | mean annual tem. 8.0-9.0 sum of precipitation (year): 600-700 mm   | 264 | pastures and artificial surfaces                         |
| Turček, nw. from the village (relève 46)          | 48°46'34.2"N,<br>18°53'09.9"E | terrain depression on the Turiec river floodplain / 1.74 | basaltic and pyroxene andesites / org.mat=15.8; C/N=13.2; pH=5.1; Mg=60.3; P=317.8; K=218.4; Ca=2144.7; ECe=0.635.                                                                                             | mean annual tem. 5.0-6.0 sum of precipitation (year): 900-1000 mm  | 616 | marshes, riparian shrubs and forests                     |
| Moškovec, sse. from the village (relève 47)       | 48°56'23.4"N,<br>18°49'47.5"E | bank of the Turiec river / 2.11                          | gray and varied clays, sands, gravels / conglomerates, lignite seams, freshwater limestones, rhyolite and andesite tuffs / org.mat=12.9; C/N=14.2; pH=7.3; Mg=2056.0; P=379.3; K=220.0; Ca=20943.1; ECe=0.240. | mean annual tem. 7.0-8.0 sum of precipitation (year): 700-800 mm   | 445 | floodplain meadows                                       |

|                                                 |                               |                                                                |                                                                                                                                                          |                                                                   |     |                                                         |
|-------------------------------------------------|-------------------------------|----------------------------------------------------------------|----------------------------------------------------------------------------------------------------------------------------------------------------------|-------------------------------------------------------------------|-----|---------------------------------------------------------|
| Zvolen, Môťová (reléve 48)                      | 48°33'21.1"N,<br>19°11'28.9"E | bank of the Slatina river / 1.81                               | pyroxene and hornblende-pyroxene andesites / org.mat=8.3; C/N=11.3; pH=4.6; Mg=74.3; P=274.7; K=360.5; Ca=1743.4; ECe=0.116.                             | mean annual tem. 8.0-9.0 sum of precipitation (year): 600-700 mm  | 307 | floodplain meadows, riparian shrubs, forests            |
| Pstruša, near railway station (reléve 49)       | 48°33'08.9"N,<br>19°18'34.9"E | terrain depression on the Slatina river floodplain / 2.16      | clays with lignite, sands, gravels / org.mat=8.3; C/N=11.1; pH=4.6; Mg=41.9; P=224.5; K=611.1; Ca=1137.5; ECe=0.096.                                     | mean annual tem. 7.0-8.0 sum of precipitation (year): 600-700 mm  | 316 | floodplain meadows, shrubs and artificial surfaces      |
| Tomášovce, s. from the village (reléve 50)      | 48°24'52.8"N,<br>19°35'31.3"E | bank of cannalized stream / 1.93                               | varied kaolinite clays, sands, gravels, rare lignite seams / org.mat=8.3; C/N=11.8; pH=6.2; Mg=145.8; P=269.0; K=696.2; Ca=1807.3; ECe=0.140.            | mean annual tem. 8.0-9.0 sum of precipitation (year): 550-600 mm  | 220 | floodplian meadows and shrubs                           |
| Breznička, Červeň settlement (reléve 51)        | 48°24'42.6"N,<br>19°44'10.7"E | bank of the Ipeľ river / 4.04                                  | metamorphosed sandstones and conglomerates, phyllites, mafic volcanites / org.mat=2.6; C/N=14.4; pH=6.0; Mg=38.8; P=323.1; K=119.6; Ca=731.0; ECe=0.064. | mean annual tem. 8.0-9.0 sum of precipitation (year): 600-700 mm  | 210 | floodplain meadows, marshes, shrubs and forests         |
| Vyšný Skálnik, w. from the village (reléve 52)  | 48°27'55.0"N,<br>19°57'36.4"E | terrain depression on the Rimava river floodplain / 2.43       | gray calcareous siltstones / org.mat=14.4; C/N=12.8; pH=6.6; Mg=156.3; P=300.0; K=382.2; Ca=3298.6; ECe=0.258.                                           | mean annual tem. 8.0-9.0 sum of precipitation (year): 600-700 mm  | 232 | crop fields, floodplain meadows and artificial surfaces |
| Žihľava, n. from the village (reléve 53)        | 48°13'38.5"N,<br>19°25'05.6"E | terrain depression on the Stará rieka stream floodplain / 2.46 | gray claystones, sands, coal seams, carbonaceous clays / org.mat=7.7; C/N=11.3; pH=6.0; Mg=83.9; P=127.7; K=411.1; Ca=1925.8; ECe=0.155.                 | mean annual tem. 9.0-10.0 sum of precipitation (year): 550-600 mm | 203 | floodplain meadows, artificial surfaces and shrubs      |
| Dolná Strehová, n. from the village (reléve 54) | 48°16'13.0"N,<br>19°26'52.5"E | terrain depression on the Tisovník stream floodplain / 3.28    | pyroxene and hornblende-pyroxene andesites / org.mat=5.7; C/N=10.2; pH=6.4; Mg=110.6; P=102.5; K=104.4; Ca=1710.7; ECe=0.134.                            | mean annual tem. 9.0-10.0 sum of precipitation (year): 550-600 mm | 199 | marshes, floodplain meadows and crop fields             |
| Jalšovník, s. margin of the village (reléve 55) | 48°18'30.1"N,<br>19°06'05.0"E | bank of the canal near road / 2.24                             | pyroxene and hornblende-pyroxene andesites / org.mat=10.3; C/N=13.2; pH=5.8; Mg=108.9; P=150.9; K=197.5; Ca=2090.9; ECe=0.201.                           | mean annual tem. 8.0-9.0 sum of precipitation (year): 550-600 mm  | 329 | floodplain meadows, artificial surfaces and shrubs      |

|                                            |                            |                                                              |                                                                                                                                                                                                        |                                                                  |     |                                                      |
|--------------------------------------------|----------------------------|--------------------------------------------------------------|--------------------------------------------------------------------------------------------------------------------------------------------------------------------------------------------------------|------------------------------------------------------------------|-----|------------------------------------------------------|
| Krupina, s. margin of the town (relève 56) | 48°19'30.4"N, 19°03'43.6"E | bank of the Krupinica river / 3.78                           | pyroxene and hornblende-pyroxene andesites / org.mat=6.8; C/N=11.6; pH=5.9; Mg=92.5; P=129.5; K=305.1; Ca=1932.6; ECe=0.129.                                                                           | mean annual tem. 8.0-9.0 sum of precipitation (year): 550-600 mm | 251 | crop fields, artificial surfaces and riparian shrubs |
| Rykynčice, n. from the village (relève 57) | 48°13'01.5"N, 18°58'24.7"E | terrain depression on the Krupinica stream floodplain / 3.18 | gray calcareous siltstones, claystones, sandstones, conglomerates, algal limestones, rhyolite and andezite tuffs / org.mat=7.2; C/N=12.4; pH=5.8; Mg=79.4; P=721.6; K=259.4; Ca=1663.7; ECe=0.156.     | mean annual tem. 8.0-9.0 sum of precipitation (year): 550-600 mm | 161 | floodplain meadows and shrubs                        |
| Šávoř, wsw. from the village (relève 58)   | 48°18'04.9"N, 19°48'50.6"E | bank of the canalized Suchá stream / 1.92                    | gray calcareous siltstones/ org.mat=8.1; C/N=12.1; pH=7.3; Mg=240.0; P=392.8; K=545.2; Ca=4472.6; ECe=0.222.                                                                                           | mean annual tem. 8.0-9.0 sum of precipitation (year): 550-600 mm | 188 | crop fields and artificial surfaces                  |
| Petrovce, ne. from the village (relève 59) | 48°11'37.5"N, 20°01'58.4"E | bank of the Mačací potok stream / 3.53                       | siltstones, claystones, sandstones, tuffites, varied and coal clays, coal, conglomerates, organodetritic limestones / org.mat=5.5; C/N=12.6; pH=7.6; Mg=493.0; P=454.7; K=676.9; Ca=9106.9; ECe=0.190. | mean annual tem. 7.0-8.0 sum of precipitation (year): 550-600 mm | 225 | floodplain meadows and shrubs                        |
| Janice, n. from the village (relève 60)    | 48°17'18.4"N, 20°12'51.6"E | bank of the canal near road / 1.72                           | siltstones, claystones, sandstones, tuffites, varied and coal clays, coal, conglomerates, organodetritic limestones / org.mat=8.5; C/N=10.0; pH=6.9; Mg=205.2; P=507.1; K=522.8; Ca=3020.4; ECe=0.274. | mean annual tem. 8.0-9.0 sum of precipitation (year): 550-600 mm | 164 | crop fields                                          |
| Hrušovo, n. from the village (relève 61)   | 48°31'11.4"N, 20°02'49.0"E | terrain depression on the Blh stream floodplain / 3.66       | dark limestones, recrystallized and cherty limestones, dark schistose limestones / org.mat=8.5; C/N=11.7; pH=6.9; Mg=189.9; P=220.6; K=157.4; Ca=2495.7; ECe=0.148.                                    | mean annual tem. 7.0-8.0 sum of precipitation (year): 600-700 mm | 251 | floodplain meadows and shrubs                        |

<sup>1</sup> Geological maps of the Czech Geological Service (<http://www.geology.cz/extranet/mapy/mapy-online/mapove-aplikace>)

<sup>2</sup> Tolasz R (ed.) (2007) Climate atlas of Czechia (in English and Czech). Český hydrometeorologický ústav and Univerzita Palackého v Olomouci, Praha & Olomouc.

<sup>3</sup><https://www.metnet.hu/>

<sup>4</sup>Dati climatici sulle città del mondo - Climate-Data.org (<https://it.climate-data.org/>)

<sup>5</sup>Bac-Bronowicz J (1997) Opady atmosferyczne (1951-1980). In: Pawlak W (ed) Atlas Śląska Dolnego i Opolskiego. Uniwersytet Wrocławski, Pracownia Atlasu Dolnego Śląska, Wrocław, p. 43.

<sup>6</sup>Piasecki J (1997) Temperatura powietrza (1951-1980). In: Pawlak W (ed) Atlas Śląska Dolnego i Opolskiego. Uniwersytet Wrocławski, Pracownia Atlasu Dolnego Śląska, Wrocław, p. 47.

<sup>7</sup>Borkowski J, Wojniak R (1997) Rodzaje i gatunki gleb. In: Pawlak W (ed) Atlas Śląska Dolnego i Opolskiego. Uniwersytet Wrocławski, Pracownia Atlasu Dolnego Śląska, Wrocław, pp. 31–32.

<sup>8</sup>Miklos L (ed) (2002) Atlas krajiny Slovenskej republiky (1. vydanie). MŽP SR, Bratislava and SAŽP, Banská Bystrica, 344 pp.
