# Supplementary material for: Ecology, threats and conservation status of Carex buekii (Cyperaceae) in Central Europe
Source: PubMed Central journal article supplement (PMC6671956; doi:10.1038/s41598-019-47563-0), 2019-08-01
Supplement: 41598_2019_47563_MOESM3_ESM.pdf [file 41598_2019_47563_MOESM3_ESM.pdf]

### Supplementary Table S3

Ecology, threats and conservation status of *Carex buekii* (Cyperaceae) in Central Europe

Helena Więclaw<sup>1</sup>, Kateřina Šumberová<sup>2</sup>, Beata Bosiacka<sup>1</sup>, Richard Hrivnák<sup>3</sup>, Zygmunt Dajdok<sup>4</sup>, Attila Mesterházy<sup>5</sup>, Chiara Minuzzo<sup>6</sup>, Edoardo Martinetto<sup>7</sup>, Jacob Koopman<sup>8</sup>

<sup>1</sup>Institute of Marine & Environmental Sciences, University of Szczecin, Wąska 13, PL-71-415 Szczecin, Poland;

<sup>2</sup>The Czech Academy of Sciences, Institute of Botany, Department of Vegetation Ecology, Lidická 25/27, CZ-602 00 Brno, Czech Republic;

<sup>3</sup>Institute of Botany, Plant Science and Biodiversity Center, Slovak Academy of Sciences, Dúbravská cesta 9, SK-845 23 Bratislava, Slovakia;

<sup>4</sup>Institute of Environmental Biology, University of Wrocław, Kanonia 6/8, PL-50-328 Wrocław, Poland;

<sup>5</sup>Directorate of Hortobágy National Park, H-4024 Sumen utca 2, Debrecen, Hungary;

<sup>6</sup>Regione Serramonte 10, I-10010 Andrate, Italy,

<sup>7</sup>Earth Sciences Department, University of Turin, Via Valperga Caluso 35, I-10125 Turin, Italy,

<sup>8</sup>ul. Kochanowskiego 27, PL-73-200 Choszczno, Poland

e-mail: [helena.wieclaw@usz.edu.pl](mailto:helena.wieclaw@usz.edu.pl)

Results of Kruskal–Wallis test and *post hoc* Dunn's multiple comparisons test, showing significance of differences in habitat conditions at *Carex buekii* sites sampled. P – Poland, CR - Czech Republic, S – Slovakia, H – Hungary, I – Italy; C/N – ratio between organic carbon and nitrogen; org. mat. – organic matter content; pH – soil pH; Ca – calcium; Mg – magnesium; P – phosphorus; K – potassium; ECe – electrolytic conductivity; H - values critical, p - statistical significance. Significance level  $p \leq 0.05$  marked in bold.

| Environmental variables | Kruskal-Wallis test |               | Dunn's multiple comparisons test |               |               |               |               |               |               |               |               |          |
|-------------------------|---------------------|---------------|----------------------------------|---------------|---------------|---------------|---------------|---------------|---------------|---------------|---------------|----------|
|                         | <i>H</i>            | <i>p</i>      | P-CR                             | P-S           | P-H           | P-I           | CR-S          | CR-H          | CR-I          | S-H           | S-I           | H-I      |
|                         |                     |               | <i>p</i>                         | <i>p</i>      | <i>p</i>      | <i>p</i>      | <i>p</i>      | <i>p</i>      | <i>p</i>      | <i>p</i>      | <i>p</i>      | <i>p</i> |
| elevation [a.s.l.]      | 45.22               | <b>0.0000</b> | <b>0.0000</b>                    | <b>0.0000</b> | <b>0.0005</b> | <b>0.0121</b> | 1.0000        | 1.0000        | 1.0000        | 1.0000        | 1.0000        | 1.0000   |
| precipitation [mm]      | 29.60               | <b>0.0000</b> | 1.0000                           | <b>0.0417</b> | <b>0.0042</b> | <b>0.0004</b> | 0.2812        | <b>0.0406</b> | <b>0.0022</b> | 1.0000        | 0.1409        | 0.4462   |
| temperature [°C]        | 26.73               | <b>0.0000</b> | 0.1402                           | 1.0000        | <b>0.0062</b> | <b>0.0004</b> | 1.0000        | 1.0000        | 0.0697        | 0.1179        | <b>0.0034</b> | 0.3518   |
| pH                      | 20.35               | <b>0.0004</b> | 1.0000                           | <b>0.0002</b> | 0.3334        | 1.0000        | <b>0.0212</b> | 1.0000        | 1.0000        | 0.4324        | 0.2629        | 1.0000   |
| K [mg/kg]               | 19.18               | <b>0.0007</b> | 1.0000                           | 1.0000        | <b>0.0131</b> | <b>0.0359</b> | 1.0000        | 0.1498        | 0.1409        | <b>0.0239</b> | 0.0514        | 1.0000   |
| silt                    | 18.05               | <b>0.0012</b> | 0.1212                           | 1.0000        | 1.0000        | 1.0000        | <b>0.0047</b> | <b>0.0013</b> | 1.0000        | 1.0000        | 1.0000        | 1.0000   |
| clay                    | 17.88               | <b>0.0013</b> | <b>0.0434</b>                    | <b>0.0095</b> | 1.0000        | 0.0788        | 1.0000        | 0.5099        | 1.0000        | 0.1703        | 1.0000        | 0.3215   |
| C/N                     | 17.13               | <b>0.0018</b> | 1.0000                           | 0.7598        | <b>0.0020</b> | 0.1499        | 1.0000        | 0.0838        | 0.7155        | 0.4472        | 1.0000        | 1.0000   |
| sand                    | 16.35               | <b>0.0026</b> | <b>0.0181</b>                    | 1.0000        | 1.0000        | 1.0000        | 0.0607        | <b>0.0035</b> | 1.0000        | 1.0000        | 1.0000        | 1.0000   |
| Ca [mg/kg]              | 16.22               | <b>0.0027</b> | 1.0000                           | <b>0.0121</b> | 0.0553        | 1.0000        | 1.0000        | 1.0000        | 1.0000        | 1.0000        | 0.1046        | 0.2055   |
| Mg [mg/kg]              | 15.46               | <b>0.0038</b> | 0.2619                           | <b>0.0412</b> | <b>0.0019</b> | 1.0000        | 1.0000        | 1.0000        | 1.0000        | 1.0000        | 1.0000        | 1.0000   |
| P [mg/kg]               | 8.56                | 0.073         | 1.0000                           | 1.0000        | 0.2200        | 0.8247        | 1.0000        | 0.7326        | 1.0000        | 0.3346        | 1.0000        | 1.0000   |
| Ece [dS/m]              | 8.01                | 0.0913        | 1.0000                           | 1.0000        | 1.0000        | 0.6752        | 1.0000        | 1.0000        | 0.4120        | 0.5196        | 1.0000        | 0.2148   |
| org. mat [%]            | 7.45                | 0.1139        | 1.0000                           | 0.0953        | 1.0000        | 1.0000        | 1.0000        | 1.0000        | 1.0000        | 0.5439        | 1.0000        | 1.0000   |
