# Supplementary material for: Ecology, threats and conservation status of Carex buekii (Cyperaceae) in Central Europe
Source: PubMed Central journal article supplement (PMC6671956; doi:10.1038/s41598-019-47563-0), 2019-08-01
Supplement: 41598_2019_47563_MOESM4_ESM.pdf [file 41598_2019_47563_MOESM4_ESM.pdf]

## Supplementary Table S4

Ecology, threats and conservation status of *Carex buekii* (Cyperaceae) in Central Europe

Helena Więclaw<sup>1</sup>, Kateřina Šumberová<sup>2</sup>, Beata Bosiacka<sup>1</sup>, Richard Hrivnák<sup>3</sup>, Zygmunt Dajdok<sup>4</sup>, Attila Mesterházy<sup>5</sup>, Chiara Minuzzo<sup>6</sup>, Edoardo Martinetto<sup>7</sup>, Jacob Koopman<sup>8</sup>

<sup>1</sup>Institute of Marine & Environmental Sciences, University of Szczecin, Wąska 13, PL-71-415 Szczecin, Poland; <sup>2</sup>The Czech Academy of Sciences, Institute of Botany, Department of Vegetation Ecology, Lidická 25/27, CZ-602 00 Brno, Czech Republic; <sup>3</sup>Institute of Botany, Plant Science and Biodiversity Center, Slovak Academy of Sciences, Dúbravská cesta 9, SK-845 23 Bratislava, Slovakia; <sup>4</sup>Institute of Environmental Biology, University of Wrocław, Kanonia 6/8, PL-50-328 Wrocław, Poland; <sup>5</sup>Directorate of Hortobágy National Park, H-4024 Sumen utca 2, Debrecen, Hungary; <sup>6</sup>Regione Serramonte 10, I-10010 Andrate, Italy, <sup>7</sup>Earth Sciences Department, University of Turin, Via Valperga Caluso 35, I-10125 Turin, Italy, <sup>8</sup>ul. Kochanowskiego 27, PL-73-200 Choszczno, Poland

e-mail: helena.wieclaw@usz.edu.pl

Results of Kruskal–Wallis test and *post hoc* Dunn's multiple comparisons test, showing significance of differences in Shannon's index, evenness and number of species in phytocoenoses with *Carex buekii*. P – Poland, CR - Czech Republic, S – Slovakia, H – Hungary, I – Italy;  $\bar{x}$  – mean; p - statistical significance. Significance level  $p \leq 0.05$  marked with bold.

| Shannon's method | All  | Country |      |      |      |      | Kruskal-Wallis test | Dunn's multiple comparisons test |              |              |       |       |       |                  |              |              |              |       |
|------------------|------|---------|------|------|------|------|---------------------|----------------------------------|--------------|--------------|-------|-------|-------|------------------|--------------|--------------|--------------|-------|
|                  |      | P       | CR   | S    | H    | I    |                     | P-CR                             | P-S          | P-H          | P-I   | CR-S  | CR-H  | CR-I             | S-H          | S-I          | H-I          |       |
| Index            | 2.82 | 3.20    | 2.00 | 2.60 | 3.42 | 3.34 | 31.62               | <0.001                           | <b>0.001</b> | 0.313        | 1.000 | 1.000 | 0.847 | <b>&lt;0.001</b> | <b>0.048</b> | <b>0.008</b> | 0.652        | 1.000 |
| Evenness         | 0.86 | 0.92    | 0.74 | 0.86 | 0.90 | 0.94 | 30.00               | <0.001                           | <b>0.001</b> | <b>0.005</b> | 1.000 | 0.736 | 1.000 | 0.137            | <b>0.001</b> | 0.335        | <b>0.002</b> | 0.114 |
| Num.Spec.        | 10   | 12      | 6    | 9    | 14   | 11   | 32.32               | <0.001                           | <b>0.002</b> | 0.421        | 1.000 | 1.000 | 0.808 | <b>&lt;0.001</b> | 0.134        | <b>0.004</b> | 1.000        | 1.000 |
