# Supplementary material for: Ecology, threats and conservation status of Carex buekii (Cyperaceae) in Central Europe
Source: Sci Rep. 2019 Aug 1;9:11162. doi: 10.1038/s41598-019-47563-0 (PMC6671956; doi:10.1038/s41598-019-47563-0)
Supplement: Supplementary file 2 — Relevés with Carex buekii [file 41598_2019_47563_MOESM2_ESM.pdf]

### Supplementary Table S2

Ecology, threats and conservation status of *Carex buekii* (Cyperaceae) in Central Europe

Helena Więclaw<sup>1</sup>, Kateřina Šumberová<sup>2</sup>, Beata Bosiacka<sup>1</sup>, Richard Hrivnák<sup>3</sup>, Zygmunt Dajdok<sup>4</sup>, Attila Mesterházy<sup>5</sup>, Chiara Minuzzo<sup>6</sup>, Edoardo Martinetto<sup>7</sup>, Jacob Koopman<sup>8</sup>

<sup>1</sup>Institute of Marine & Environmental Sciences, University of Szczecin, Wąska 13, PL-71-415 Szczecin, Poland; <sup>2</sup>The Czech Academy of Sciences, Institute of Botany, Department of Vegetation Ecology, Lidická 25/27, CZ-602 00 Brno, Czech Republic; <sup>3</sup>Institute of Botany, Plant Science and Biodiversity Center, Slovak Academy of Sciences, Dúbravská cesta 9, SK-845 23 Bratislava, Slovakia; <sup>4</sup>Institute of Environmental Biology, University of Wrocław, Kanonia 6/8, PL-50-328 Wrocław, Poland; <sup>5</sup>Directorate of Hortobágy National Park, H-4024 Sumen utca 2, Debrecen, Hungary; <sup>6</sup>Regione Serramonte 10, I-10010 Andrate, Italy, <sup>7</sup>Earth Sciences Department, University of Turin, Via Valperga Caluso 35, I-10125 Turin, Italy, <sup>8</sup>ul. Kochanowskiego 27, PL-73-200 Choszczno, Poland

**Relevés with *Carex buekii*** (bold font - species found in more than 2 samples)

Detailed informations about the *Carex buekii* stands are in Supplementary material 1

[illegible]

[illegible]

[illegible]

[illegible]

[illegible]
